# Supplementary material
Source: PubMed Central journal article supplement (PMC9242699)
Supplement: mmc1.pdf [file mmc1.pdf]

## **Síndrome de Guillain Barré en asociación a infección por Sars Cov2: Serie de casos en un año de pandemia en cuatro ciudades de Colombia.**

Nathaly Ceron Blanco, Universidad del Rosario: Universidad del Rosario, BOGOTÁ, COLOMBIA

Jesús Hernán Rodríguez Quintana, Neurólogo, Fundación Cardioinfantil Instituto de Cardiología: Fundación Cardioinfantil Instituto de Cardiología

María Camila Valencia Mendoza, Residente de Neurología, Fundación Cardioinfantil Instituto de Cardiología

César Augusto Forero Botero, Neurólogo, Fundación Santa Fe de Bogotá: Luis Carlos Rodríguez, Fisiatra, Fundación Santa Fe de Bogotá:

Sandra Carrillo Villa, Neuróloga, Fundación Cardiovascular de Colombia

Angela María Gómez Mazuera, Neuróloga, Fundación Santa Fe de Bogotá

Jorge Alberto Angarita Díaz, Neurólogo, Universidad Nacional de Colombia - Sede Bogotá: Universidad Nacional de Colombia

Bernardo Uribe García, Universidad de Manizales

Cristian Camilo Bermúdez Riveros, Neurólogo, Universidad del Rosario

Juan Alban, Universidad Surcolombiana

**Autora para la correspondencia:** Nathaly Ceron Blanco

[nathaly.ceron@urosario.edu.co](mailto:nathaly.ceron@urosario.edu.co)

### **Resumen:**

La infección por SARS-CoV-2 se ha asociado a múltiples manifestaciones neurológicas. Una de ellas que se ha descrito desde los inicios de la pandemia y que ha cobrado relevancia para la práctica neurológica actual, es el Síndrome de Guillain-Barré. Se han descrito algunos de los mecanismos neurotóxicos propios del virus, sus posibles vías de afectación al nervio periférico en estudios experimentales, sin embargo aún faltan por dilucidar mecanismos de generación de respuesta inmune cruzada que lleven a la aparición de este síndrome en el contexto específico de la infección por SARS-CoV-2. Colombia es uno de los países de América Latina con mayor afectación por la actual pandemia, siendo el tercer país con mayor contagio en la región, por lo cual el reconocimiento del Síndrome de Guillain Barré se vuelve necesario ya que es una potencial complicación postinfecciosa que puede comprometer seriamente la funcionalidad del paciente de no recibir un diagnóstico adecuado tratamiento oportuno. A continuación se presenta una serie de casos de 12 pacientes de cuatro centros hospitalarios ubicados en diferentes ciudades de Colombia, quienes presentaron cuadros de Síndrome de Guillain-Barré asociado a la infección por SARS-CoV-2 y se describirán las características clínicas de presentación, hallazgos de laboratorio, estudio electrodiagnóstico y tratamiento.

**Palabras clave:** Guillain-Barré, coronavirus, SARS-CoV-2, debilidad, electrodiagnóstico, polineuropatía aguda, inmunoglobulina, recambio plasmático

### **Introducción**

En el año 2020 se declaró la pandemia ocasionada por la infección por el virus SARS-CoV-2, virus de la familia del coronavirus, adoptándose el nombre de COVID-19 a la enfermedad (1). En Bogotá, Colombia, se confirmó el primer caso de COVID-19 el 6 de marzo de 2020 (2). Los principales síntomas reportados en la infección por SARS-CoV-2 son fiebre (43.8% en la admisión y 88.7% durante la hospitalización) y tos (67.8%) (3). Otros síntomas encontrados son fatiga (38.1%), producción de esputo (33.7%) y cefalea (13.6%). Los principales signos neurológicos reportados en los pacientes con infección severa por SARS-Cov-2 son agitación (69%), compromiso en tracto corticoespinal (67%) y delirium (65%) (4). Las principales complicaciones neurológicas descritas asociadas a Covid 19 son: anosmia, disgeusia, encefalopatía, Síndrome de Guillain Barre, complicaciones cerebrovasculares y daño en músculo esquelético (5–8).

En el presente artículo se presenta una serie de casos de pacientes con síndrome de Guillain-Barré asociado a infección por SARS-CoV-2. Se recolectaron casos de diferentes instituciones médicas de Colombia.

## Metodología:

Estudio descriptivo tipo serie de casos en el periodo comprendido de 2020 a 2021, donde se tomaron casos de los siguientes Centros hospitalarios: Fundación Cardioinfantil (Bogotá), Fundación Santa Fe de Bogotá (Bogotá), Clínica Medilaser (Neiva), Clínica San Luis (Bucaramanga), Clínica Ospedale (Manizales) que cumplan con los criterios de inclusión: Pacientes mayores de 18 años, Diagnóstico clínico y neurofisiológico de neuropatía aguda según Criterios de Asbury, sintomatología sugestiva de Sars Cov2 desde 2 meses hasta una semana previa o durante sintomatología neurológica aguda prueba positiva para Sars Cov2 (antígeno, filarray respiratorio o PCR) documentada durante el curso de la neuropatía o un mes previo a la aparición de síntomas de debilidad.

## Resultados:

En la siguiente tabla se adjuntan las principales características clínicas y de laboratorio de los pacientes con Síndrome de Guillain Barré asociado a Sars Cov2

**Tabla 1. Pacientes con Síndrome de Guillain Barré e infección por Sars Cov2. Características clínicas, de electrodiagnóstico y laboratorio**

| # | Sexo | Edad | Síntomas respiratorios/Gastroint | Días hasta inicio de síntomas neurológicos | Neumonía | Síntomas/signos neurológicos | Diagnóstico de Sars Cov2 | LCR | EMG Y NC | Nivel de Certeza (Brighton) | Tratamiento | Rankin modificado al egreso (0 a 6) |
|---|------|------|----------------------------------|--------------------------------------------|----------|------------------------------|--------------------------|-----|----------|-----------------------------|-------------|-------------------------------------|
|---|------|------|----------------------------------|--------------------------------------------|----------|------------------------------|--------------------------|-----|----------|-----------------------------|-------------|-------------------------------------|

|    |   |    | estinales<br>previos           |    |    |                                                                                                                                                                                                                              |                                                                           |                                                                                                                                                                        |                                                                                                                                                                                                                                                                                                                               |   |                     |   |
|----|---|----|--------------------------------|----|----|------------------------------------------------------------------------------------------------------------------------------------------------------------------------------------------------------------------------------|---------------------------------------------------------------------------|------------------------------------------------------------------------------------------------------------------------------------------------------------------------|-------------------------------------------------------------------------------------------------------------------------------------------------------------------------------------------------------------------------------------------------------------------------------------------------------------------------------|---|---------------------|---|
| 1  | M | 55 | Tos,<br>odinofagia,<br>diarrea | 30 | No | Disartria subita, diparesia<br>facial                                                                                                                                                                                        | 11/04/20 PCR<br>positiva                                                  | Proteínas<br>210 mg/dl<br>leucocitos 0                                                                                                                                 | Neuropatía axonal<br>severa de nervio<br>facial derecho e<br>izquierdo de<br>evolución aguda<br>con compromiso<br>de sus ramas<br>temporal,<br>cigomática, bucal<br>y mentoniana                                                                                                                                              | 1 | Ninguno             | 1 |
| 2  | M | 73 | Diarrea                        | 7  | No | Pérdida de la fuerza muscular<br>de las 4 extremidades con<br>imposibilidad para la marcha,<br>hasta la postración.<br>Arreflexia                                                                                            | 28/09/20 PCR<br>positiva                                                  | Proteínas<br>55 mgs/dl,<br>leuc 2.5,<br>mononuclea<br>res 100 %                                                                                                        | Polirradiculoneuro<br>patía motora<br>axonal aguda con<br>mínimos signos de<br>denervación aguda                                                                                                                                                                                                                              | 1 | Inmunoglobulina IV  | 3 |
| 3  | M | 54 | Fiebre y<br>diarrea            | 5  | No | Arreflexia<br>cervicalgia y dolor lumbar,<br>debilidad de miembros<br>superiores, luego inferiores,<br>con mialgias                                                                                                          | 01/10/20: Film<br>array positivo                                          | Proteínas<br>67.4 mgs/dl<br>leucocitos<br>no se<br>observan                                                                                                            | Polineuropatía<br>sensitivo motora<br>de tipo<br>desmielinizante.<br>Y enfermedad<br>intrínseca de la<br>fibra muscular.                                                                                                                                                                                                      | 2 | Inmunoglobulina IV  | 4 |
| 4  | M | 51 | No                             | NA | No | dolor lumbar intenso<br>irradiado a cara posterior de<br>ambas piernas con debilidad<br>progresiva de las mismas y<br>posterior parestesias en<br>manos                                                                      | 21/10/20 PCR<br>positiva                                                  | Proteínas<br>149mgr/dl<br>leucocitos 0                                                                                                                                 | polineuroradiculop<br>atía<br>desmielinizante<br>con predominio en<br>miembros<br>inferiores.                                                                                                                                                                                                                                 | 2 | Recambio plasmático | 3 |
| 5  | M | 62 | Aguesia                        | 1  | No | Cefalea global opresiva de<br>predominio occipital,<br>desviación de comisura labial<br>bilateral, hemiparesia<br>derecha, disartria, disfagia,<br>arreflexia, parestesias en bota<br>y guante.                              | 26/10/20:<br>Antígeno SARS<br>CoV 2 negativo<br>03/11/20: PCR<br>positiva |                                                                                                                                                                        | Polineuropatía<br>sensitivo-motora<br>de predominio<br>axonal.                                                                                                                                                                                                                                                                | 3 | Inmunoglobulina IV  | 3 |
| 6  | F | 57 | Tos, disnea,<br>anosmia        | 20 | Si | Alteración de conciencia,<br>cuadriparesia flácida,<br>arreflexia                                                                                                                                                            | 12/12/20 PCR<br>positiva                                                  | Proteínas<br>52.8 mg/dl<br>leucos 0                                                                                                                                    | 20/01/21<br>Polineuropatía<br>aguda sensitivo<br>motora<br>desmielinizante                                                                                                                                                                                                                                                    | 2 | Recambio plasmático | 5 |
| 7  | F | 61 | Si                             | 15 | No | Debilidad de miembros<br>inferiores ascendente<br>progresivo con hipoestesias<br>generalizadas, caída de su<br>altura                                                                                                        | 10/01/21 PCR<br>positiva                                                  | Proteínas<br>147 mg/dl<br>Glucosa :<br>175<br>(Central<br>271 mg/dl)<br>Leucos 2                                                                                       | polineuropatía<br>axonal motora<br>simétrica                                                                                                                                                                                                                                                                                  | 1 | Recambio plasmático | 3 |
| 8  | F | 71 | No/contacto<br>estrecho        | NA | No | Parestesias, dolor urente,<br>proximal a distal en<br>miembros inferiores, facial<br>periférico                                                                                                                              | 20/02/21: PCR<br>indeterminada,<br>22/02/21: PCR<br>positiva              | Proteínas<br>230, 4<br>Leucocitos<br>2, 5                                                                                                                              | polineuropatía de<br>predominio<br>mielínico con<br>compromiso motor<br>simétrico                                                                                                                                                                                                                                             | 1 | Recambio plasmático | 3 |
| 9  | M | 57 | Fiebre y<br>diarrea            | 8  | No | Parestesia de miembros<br>inferiores, incapacidad para<br>la marcha, incontinencia<br>urinaria, parestesias en<br>manos, paraparesia flácida<br>arreflectica, hipoestesia en<br>botas y guantes largos, ataxia<br>sensitiva. | 22/10/20 PCR<br>positiva                                                  | Proteínas<br>288 mg/dl<br>Leucocitos<br>0                                                                                                                              |                                                                                                                                                                                                                                                                                                                               | 2 | Recambio plasmático | 3 |
| 10 | M | 43 | Disfagia,<br>fiebre            | 15 | No | Parestesia de extremidades,<br>diparesia facial                                                                                                                                                                              | 18/07/20 PCR<br>positiva                                                  | No                                                                                                                                                                     | Polineuropatía<br>sensitiva y motora<br>de tipo mielínica<br>con componente<br>axonal,<br>de evolución aguda,<br>de leve expresión,<br>con un mayor<br>compromiso en<br>nervios craneales.<br>En el contexto<br>clínico estos<br>hallazgos sugieren<br>polineuropatía<br>desmielinizante<br>inflamatoria aguda                | 2 | No                  | 2 |
| 11 | F | 42 | Fiebre,<br>artralgias          | 8  | No | Diparesia facial<br>Parestesias en las 4<br>extremidades<br><br>Reingreso: Dificultad para la<br>marcha                                                                                                                      | 20/07/21 PCR<br>positiva                                                  | 26/07/21:<br>LCR:<br>Proteinorra<br>quia 67<br>glucorraqui<br>a de 59<br>Leucos 0<br><br>28/08/21:<br>proteinorra<br>quia en<br>220glucorra<br>quia de 57.<br>Leucos 1 | polineuropatía<br>sensitiva y motora<br>de tipo mielínica<br>(desmielinización<br>segmentaria) con<br>componente<br>axonal secundario,<br>de evolución<br>aguda, de leve<br>expresión, con un<br>mayor<br>compromiso en<br>nervios faciales.<br>Hallazgos sugieren<br>polineuropatía<br>desmielinizante<br>inflamatoria aguda | 1 | Inmunoglobulina IV  | 3 |
| 12 | M | 38 | Tos, fiebre,<br>disfagia       | 45 | No | Disfagia<br>Debilidad en miembros<br>inferiores<br>Incapacidad para la marcha                                                                                                                                                | 15/05/21: PCR<br>positiva                                                 | No                                                                                                                                                                     | polineuropatía<br>motora de tipo<br>axonal con<br>componente<br>mielínico y<br>evolución aguda,<br>de moderada<br>expresión.                                                                                                                                                                                                  | 2 | Inmunoglobulina IV  | 2 |

LCR: Líquido cefalorraquídeo

EM + NC: Electromiografía más neuroconducciones. Se incluye onda F y reflejo H

## Discusión

La asociación entre infecciones virales y Guillain-Barré, se ha descrito ampliamente en el pasado. Dentro de estas, la Infección con *Campylobacter jejuni*, citomegalovirus o *Mycoplasma pneumoniae* precede al síndrome de Guillain-Barré en hasta dos tercios de las personas afectadas (9). Aunque esta asociación no se describió en pacientes infectados en el brote previo de coronavirus SARS-CoV-1, si ha sido ampliamente descrita en paciente con COVID-19 (10). En la reciente pandemia de virus zika en Colombia se documentaron cerca de 70 pacientes con diagnóstico confirmado mediante PCR-RT que desarrollaron SGB (11).

La afectación del nervio periférico en SARS-CoV-2 se ha documentado en la actual pandemia, reportándose el primer caso en abril de 2020, en Wuhan, donde una mujer de 61 años que presenta debilidad aguda de inicio en miembros inferiores, arreflexia y progresión en un día y en hallazgos paraclínicos se documentó disociación albúmino-citológica, ausencia de ondas F y aumento de latencias en neuroconducciones. Dichas manifestaciones precedieron la sintomatología respiratoria (7). En Italia reportaron un caso similar donde el paciente de 71 años desarrolló debilidad aguda días antes de la manifestación de la infección, lo que sugiere que el Guillain-Barré puede ocurrir paralelamente con el SARS-CoV-2 (9).

En una revisión sistemática donde incluyeron 39 estudios y se analizaron 50 pacientes de Guillain Barré posterior a COVID-19, se encontró que la variante más comúnmente presente fue la AIDP en un 66% y la proporción de presentación en la variante axonal no fue infrecuente ya que se presentó en un 34% de la población analizada. La mayoría de pacientes presentaron certeza diagnóstica Brighton 1 (66%). El aumento de proteínas en líquido cefalorraquídeo fue ligeramente más elevado en las variantes axonales. Los pacientes fueron tratados con inmunoglobulina IV y recambio plasmático sin demostrarse superioridad en desenlaces funcionales entre una u otra terapia (12).

Dentro de los mecanismos neurotrópicos periféricos del SARS-CoV-2 se ha estudiado un subconjunto de nociceptores humanos que expresan los genes MRGPRD y CALCA los cuales también expresan ARNm de ECA2, éste último por el cual el SARS-CoV-2 muestra una alta afinidad, mecanismo que explicaría algunos fenómenos dolorosos en esta infección (13).

Adicionalmente se debe tener en cuenta la respuesta inmune exagerada desencadenada por el SARS-CoV-2 caracterizada por producción aumentada de múltiples factores inflamatorios, fenómeno denominado "tormenta de citocinas", el cual es responsable de mediar el daño tisular en pacientes con COVID-19 (7). Dentro de los mediadores inmunes que se producen exageradamente en respuesta al SARS-CoV-2 se incluyen IL2, IL-6, IL7, IL10, G-SCF, CXCL10, MCP-1, MIP-1A y TNF $\alpha$ , de los cuales IL-1 $\beta$ , IL-6, CXCL10 y TNF $\alpha$  son las citocinas con mayor capacidad para generar daño tisular en varios órganos, debido a sus propiedades proinflamatorias. La IL-1 $\beta$  e IL-6 se han implicado en neurotoxicidad y poseen efectos que deterioran la función endotelial (9).

En Colombia se encuentran en circulación 54 linajes de SARS-CoV-2. De las variantes detectadas se ha encontrado alta frecuencia en la circulación de B.1., B.1.111 y B.1.420 en 29 departamentos (14). De estas variantes, en la B.1.111 se han descrito más de 13 mutaciones diferentes. En marzo de 2021 se documentó el primer caso de variante brasileña P1 en Bogotá,

sin documentarse otros casos (15). Actualmente también se ha documentado la circulación de la cepa británica en el país (16).

Los casos presentados se documentaron entre el segundo y tercer pico de pandemia. Las ciudades con mayor número de infectados son Bogotá, Medellín y Barranquilla. El país se encuentra finalizando segunda fase de vacunación (17). En Latinoamérica hay al menos 28.910.000 contagios y 920.000 muertes documentadas a causa del SARS-CoV-2 y Colombia al tercer pico se ubicó en el tercer lugar de la región con mayor índice de contagios por debajo de Brasil y Argentina (14)

En los casos descritos en esta serie, el Síndrome de Guillain Barré asociado a infección por SARS-CoV-2 se encuentra una edad promedio de presentación de 55.3 años, el caso más joven con 38 años. Adicionalmente existe variación en cuanto al inicio de los síntomas en los casos reportados, es decir, el inicio del síndrome de debilidad va desde un 1 un día posterior al comienzo de la sintomatología hasta 45 días posteriores a su inicio, algunos se presentaron con una o dos semanas posteriores al cuadro respiratorio. Así mismo se encuentra que 2 de los casos no presentaron síntomas respiratorios previos al cuadro y la sintomatología neurológica fue la primera manifestación del SARS-CoV-2 en estos pacientes, detectándose este virus en los estudios de ampliación. Uno de los casos presentó sintomatología respiratoria por 2 semanas y fue vacunada 1 semana después de resolver dicha sintomatología.

En cuanto a los síntomas de debilidad, se observa que en ocho de los casos se presentó cuadro de debilidad que inicia en miembros inferiores y cursa de manera ascendente asociado a síntomas sensitivos. Uno de los casos se presentó con cefalea y hemiparesia derecha con arreflexia. En cuatro casos hubo compromiso facial periférico, tres de ellos dado por diparesia facial y el otro por parálisis facial periférica. Sólo uno de los casos presentó debilidad que inició en miembros superiores y uno presentó alteración del estado de conciencia manifestado con coma, lo cual ante los hallazgos adicionales de arreflexia y debilidad podría considerarse un posible caso de encefalitis de Bickerstaff como variante de presentación. Dos de los casos rápida progresión con EGRIS de 5 puntos requirieron soporte ventilatorio. En uno de los casos se describe la presencia de disautonomías. La presentación aunque fue heterogénea, predominó la debilidad ascendente, ía de los casos. No se realizaron estudios antigangliósidos en ninguno de los casos, la certeza diagnóstica fue llevada a cabo con clínica y estudios auxiliares. En cuanto a la aparición de neumonía, sólo 2 pacientes presentaron neumonía por Sars Cov2. La mayoría de pacientes tuvo manifestaciones leves de sintomatología respiratoria o gastrointestinal, lo cual muestra que la severidad clínica del Sars Cov2 no se correlacionó directamente con el desarrollo de neuropatía aguda.

En los hallazgos de estudios de laboratorio, todos los pacientes cuentan con test diagnóstico confirmatorio de SARS-CoV-2 con Reacción de Cadena de Polimerasa (PCR) o con prueba de antígeno. Se cuenta con el reporte de líquido cefalorraquídeo de 9 de los 12 pacientes y en lo documentado observándose en la mayoría de los casos disociación albúmino citológica, con un aumento de proteínas desde un grado leve hasta un aumento significativo, y celularidad normal. No se documentó pleocitosis, tampoco aislamiento de germen en líquido cefalorraquídeo.

En el electrodiagnóstico, se cuenta con los reportes de la electromiografía más neuroconducciones más reflejo H y onda F de las cuatro extremidades de 10 pacientes. La polineuropatía axonal motora y sensitiva simétrica constituyó el hallazgo neurofisiológico más frecuente seguido por desmielinización aguda motora, en contraste a lo descrito en la literatura, donde la AIDP variante es la más común, aunque se ve componente axonal y mielínico.

Desde el punto de vista terapéutico, 5 pacientes recibieron tratamiento con plasmaféresis en esquemas interdiario y consecutivo y 5 recibieron manejo con inmunoglobulina intravenosa sin describirse efectos adversos, en la mayoría de casos observándose mejoría clínica y dando egreso para continuar rehabilitación ambulatoria. No hubo deceso de ninguno de los pacientes. Dos de los pacientes ante presentación leve, no recibieron manejo y requirieron rehabilitación. Llamativamente la paciente que recibió la vacuna, ingresó inicialmente con sintomatología leve y posteriormente presentó progresión clínica y aumento de proteinorraquia en líquido cefalorraquídeo. De los 12 pacientes, dos de ellos no requirieron terapia con inmunoglobulina ni recambio plasmático ante la presentación leve del cuadro y encontrarse diparesia facial sin afectación en la marcha.

En cuanto a desenlaces funcionales, la mayoría de los pacientes egresaron con una discapacidad moderada a severa.

### **Conclusión:**

Dentro de las afectaciones neurológicas del SARS-CoV-2 se debe tener en cuenta los síndromes de debilidad aguda, detectar y reconocer adecuadamente el Síndrome de Guillain Barré. Se debe tener en cuenta además que la presentación del Síndrome de Guillain Barré asociado al SARS-CoV-2 puede ser muy heterogénea, puede incluso la manifestación inicial de la infección viral. La severidad de la sintomatología respiratoria no se correlacionó con un mayor riesgo de presentar neuropatía aguda y la mayoría de los casos tuvieron sintomatología respiratoria leve. La mayoría presentó disociación albúmino citológica, estuvo presente de manera equiparable las variantes axonal y desmielinizante en los casos presentados y hubo adecuada respuesta a la terapia con recambio plasmático.

Aún faltan por dilucidar mecanismos moleculares que faciliten la comprensión de la neuropatía aguda en el contexto de Sars Cov2. Sin embargo dados los hallazgos de este estudio y ante el estado emergente de este nuevo virus respiratorio, se debe considerar estudiar de rutina como una de las etiologías infecciosas causantes de parálisis flácida aguda.

### **Consideraciones éticas**

Declaramos que seguimos los protocolos de nuestro centro en la publicación de datos de pacientes y disponemos del consentimiento del paciente para la publicación del caso.

### **Conflictos de interés**

Los autores declaran no tener conflictos de intereses.

## Bibliografía

1. Lu R, Zhao X, Li J, Niu P, Yang B, Wu H, Wang W, Song H, Huang B, Zhu N, Bi Y, Ma X, Zhan F, Wang L, Hu T, Zhou H, Hu Z, Zhou W, Zhao L, Chen J, Meng Y, Wang J, Lin Y, Yuan J, Xie Z, Ma J, Liu WJ, Wang D, Xu W, Holmes EC, Gao GF, Wu G, Chen W, Shi W, Tan W. Genomic characterisation and epidemiology of 2019 novel coronavirus: implications for virus origins and receptor binding. *Lancet*. 2020 Feb 22;395(10224):565-574. doi: 10.1016/S0140-6736(20)30251-8.
2. Ministerio de salud de Colombia. CORONAVIRUS (COVID-19). Fecha de consulta: 23 de febrero de 2021. Disponible en: [https://www.minsalud.gov.co/salud/publica/PET/Paginas/Covid-19\\_copia.aspx](https://www.minsalud.gov.co/salud/publica/PET/Paginas/Covid-19_copia.aspx).
3. Eastin, C., & Eastin, T. (2020). Clinical Characteristics of Coronavirus Disease 2019 in China: Guan W, Ni Z, Hu Y, et al. *N Engl J Med*. 2020 Feb 28 [Online ahead of print] DOI: 10.1056/NEJMoa2002032. *The Journal of Emergency Medicine*, 58(4), 711–712. <https://doi.org/10.1016/j.jemermed.2020.04.004>
4. Helms J, Kremer S, Merdji H, Clere-Jehl R, Schenck M, Kummerlen C, Collange O, Boulay C, Fafi-Kremer S, Ohana M, Anheim M, Meziani F. Neurologic Features in Severe SARS-CoV-2 Infection. *N Engl J Med*. 2020 Jun 4;382(23):2268-2270. doi: 10.1056/NEJMc200859
5. Xydakis MS, Dehgani-Mobaraki P, Holbrook EH, Geisthoff UW, Bauer C, Hautefort C, Herman P, Manley GT, Lyon DM, Hopkins C. Smell and taste dysfunction in patients with COVID-19. *Lancet Infect Dis*. 2020 Sep;20(9):1015-1016. doi: 10.1016/S1473-3099(20)30293-0.
6. Toscano G, Palmerini F, Ravaglia S, Ruiz L, Invernizzi P, Cuzzoni MG, Franciotta D, Baldanti F, Daturi R, Postorino P, Cavallini A, Micieli G. Guillain-Barré Syndrome Associated with SARS-CoV-2. *N Engl J Med*. 2020 Jun 25;382(26):2574-2576. doi: 10.1056/NEJMc2009191.
7. Zhao H, Shen D, Zhou H, Liu J, Chen S. Guillain-Barré syndrome associated with SARS-CoV-2 infection: causality or coincidence? *Lancet Neurol*. 2020 May;19(5):383-384. doi: 10.1016/S1474-4422(20)30109-5.
8. Jin H, Hong C, Chen S, Zhou Y, Wang Y, Mao L, Li Y, He Q, Li M, Su Y, Wang D, Wang L, Hu B. Consensus for prevention and management of coronavirus disease 2019 (COVID-19) for neurologists. *Stroke Vasc Neurol*. 2020 Jun;5(2):146-151. doi: 10.1136/svn-2020-000382.
9. Guadarrama-Ortiz P, Choreño-Parra JA, Sánchez-Martínez CM, Pacheco-Sánchez FJ, Rodríguez-Nava AI, García-Quintero G. Neurological Aspects of SARS-CoV-2

Infection: Mechanisms and Manifestations. Front Neurol. 2020 Sep 4;11:1039. doi: 10.3389/fneur.2020.01039.

10. Caress JB, Castoro RJ, Simmons Z, Scelsa SN, Lewis RA, Ahlawat A, Narayanaswami P. COVID-19-associated Guillain-Barré syndrome: The early pandemic experience. Muscle Nerve. 2020 Oct;62(4):485-491. doi: 10.1002/mus.27024.
11. Parra B, Lizarazo J, Jiménez-Arango JA, Zea-Vera AF, González-Manrique G, Vargas J, Angarita JA, Zuñiga G, Lopez-Gonzalez R, Beltran CL, Rizcala KH, Morales MT, Pacheco O, Ospina ML, Kumar A, Cornblath DR, Muñoz LS, Osorio L, Barreras P, Pardo CA. Guillain-Barré Syndrome Associated with Zika Virus Infection in Colombia. N Engl J Med. 2016 Oct 20;375(16):1513-1523. doi: 10.1056/NEJMoa1605564.
12. Sriwastava S, Kataria S, Tandon M, Patel J, Patel R, Jowkar A, Daimee M, Bernitsas E, Jaiswal P, Lisak RP. Guillain Barré Syndrome and its variants as a manifestation of COVID-19: A systematic review of case reports and case series. J Neurol Sci. 2021 Jan 15;420:117263. doi: 10.1016/j.jns.2020.117263.
13. McFarland AJ, Yousuf MS, Shiers S, Price TJ. Neurobiology of SARS-CoV-2 interactions with the peripheral nervous system: implications for COVID-19 and pain. Pain Rep. 2021 Jan 7;6(1):e885. doi: 10.1097/PR9.0000000000000885.
14. Ministerio de salud de Colombia. Covid-19 en Colombia, genoma. Consultado el 20/02/22 Disponible en: <https://www.ins.gov.co/Noticias/Paginas/coronavirus-genoma.aspx>
15. Ministerio de Salud y. Protección de Colombia. Colombia mantiene vigilancia de cepa brasileña de covid-19. Consultado el 20 de abril de 2021, de Gov.co Disponible en: <https://www.minsalud.gov.co/Paginas/Colombia-mantiene-vigilancia-de-cepa-brasilena-de-covid-19.aspx>.
16. Ministerio de Salud y Protección de Colombia. Colombia mantiene vigilancia de cepa brasileña de covid-19. Consultado el 02 de enero de 2022 Disponible en: <https://www.minsalud.gov.co/Paginas/Se-identifica-cepa-britanica-del-covid-19-en-Caldas.aspx?ID=9648>. No Title.
17. Ministerio de Salud y Protección de Colombia. Nuevo coronavirus COVID-19.. Consultado el 13 de diciembre de 2021 Disponible en: [https://www.minsalud.gov.co/salud/publica/PET/Paginas/Covid-19\\_copia.aspx](https://www.minsalud.gov.co/salud/publica/PET/Paginas/Covid-19_copia.aspx)
